# Supplementary material for: Association of heat shock protein polymorphisms with patient susceptibility to coronary artery disease comorbid depression and anxiety in a Chinese population
Source: PeerJ. 2021 Jun 18;9:e11636. doi: 10.7717/peerj.11636 (PMC8216166; doi:10.7717/peerj.11636)
Supplement: Supplemental Information 1 [file peerj-09-11636-s001.xlsx]

## Sheet: Sheet1
No	group			age	GAD-7 score	PHQ-9 score	Smoke	Drink	Hypertension	Diabetes mellitus	Stroke	Insomrnia	rs2763979	rs2075800	rs1380154	rs391957	rs17840761	rs11218941	rs10892958	rs2236658	rs4802	rs4936770	rs1042665	rs10873531	rs8005905	rs1165678	rs1165681	rs1882019	rs3794241
1	CAD	CAD+D	CAD-A	43	0	9	N	N	N	N	N	N	CC	CC	CC	TT	GA	GG	GG	CC	GG	TT	CT	AA	AA	AA	CC	GG	CC
2	CAD	CAD+D	CAD+A	51	17	18	N	N	N	N	N	N	CT	CT	TT	TT	GA	GG	GG	CC	GG	TT	CC	AA	AA	AA	CT	GA	CC
3	CAD	CAD+D	CAD+A	64	5	6	N	N	Y	N	N	N	CC	CT	CC	CC	GA	GA	GC	CT	AG	TC	CC	AG	AT	AG	CT	GG	CC
4	CAD	CAD-D	CAD+A	58	13	2	N	N	Y	N	N	N	CC	CC	CT	CC	GA	AA	CC	TT	AA	CC	CC	AA	AA	AA	CT	GA	CT
5	CAD	CAD+D	CAD+A	56	10	9	Y	Y	Y	N	N	N	CC	CC	CT	CT	GA	GA	GC	CT	AG	TC	CT	AA	AA	AG	TT	GA	CC
6	CAD	CAD+D	CAD+A	65	7	7	N	N	N	N	N	N	CT	CT	TT	CC	GG	AA	CC	TT	GG	TT	CT	AA	AA	AA	CT	GA	CC
7	CAD	CAD-D	CAD-A	54	0	3	N	N	Y	Y	N	N	CT	CT	TT	CC	AA	GG	GG	CC	GG	TT	CC	AA	AA	AG	CT	GA	CT
8	CAD	CAD-D	CAD+A	59	6	1	Y	Y	Y	N	N	N	CT	CT	CT	CC	AA	AA	CC	TT	AG	TC	CT	AA	AA	AA	CC	GG	CT
9	CAD	CAD-D	CAD-A	53	1	4	N	N	Y	N	N	N	CT	CT	CC	CC	AA	AA	CC	TT	AA	CC	CC	AA	AA	AA	TT	AA	CT
10	CAD	CAD+D	CAD+A	35	12	17	Y	Y	Y	Y	N	Y	TT	CC	CT	CT	GA	GA	GC	CT	AA	TC	CT	AA	AA	AA	CT	GA	CC
11	CAD	CAD+D	CAD+A	61	5	8	N	N	Y	N	N	Y	CT	CT	CC	CT	GA	GA	GC	CT	AA	TC	CC	AA	AA	AA	CT	GA	CT
12	CAD	CAD-D	CAD-A	63	6	0	Y	N	Y	N	N	N	CT	CC	CT	CC	GA	AA	CC	TT	AA	CC	CT	GG	AT	AA	TT	AA	CC
13	CAD	CAD-D	CAD-A	62	1	1	N	N	Y	Y	N	N	CT	CT	CC	CC	GA	GA	GC	CT	AA	TC	CC	AA	AA	AA	CT	GA	CC
14	CAD	CAD-D	CAD-A	51	1	3	Y	Y	Y	Y	N	N	CC	TT	CT	CC	GA	GA	GC	CT	AG	TC	CT	AA	AA	AA	CC	GG	CC
15	CAD	CAD-D	CAD-A	57	1	0	N	N	Y	N	N	N	CC	CT	TT	CC	GA	GG	GG	CT	GG	TT	TT	GG	TT	AA	CT	GA	TT
16	CAD	CAD+D	CAD+A	54	6	8	N	N	N	N	N	Y	CC	CT	TT	CT	GA	GA	GC	CT	AG	TC	CC	AG	AT	AA	CT	GA	CC
17	CAD	CAD-D	CAD-A	52	2	2	N	N	Y	Y	N	N	CT	CT	TT	TT	AA	GA	GC	CT	AG	TC	CC	AA	AA	AA	CT	GA	CC
18	CAD	CAD-D	CAD-A	61	2	2	N	Y	Y	N	N	N	CC	CT	CT	CT	GA	GA	GC	CT	AG	TC	CC	AG	AA	AG	TT	GA	CC
19	CAD	CAD-D	CAD-A	49	0	0	N	N	Y	Y	N	N	TT	CT	CT	CC	GA	GG	GG	CT	GG	TT	TT	GG	TT	AG	CT	GG	CC
20	CAD	CAD-D	CAD-A	63	0	2	N	N	Y	Y	N	N	CT	CT	CC	CC	GA	GA	GC	CT	GG	TT	CT	AA	AA	AG	CT	GA	CC
21	CAD	CAD+D	CAD+A	66	8	7	Y	Y	N	N	N	N	CT	CC	TT	CT	GG	GA	GC	CT	AG	TC	CC	AA	AA	AG	TT	GA	CC
22	CAD	CAD-D	CAD-A	56	4	2	N	Y	Y	N	Y	N	CT	CC	CT	CC	GA	GG	GG	CT	GG	TT	CC	AA	AA	AG	CT	GG	CT
23	CAD	CAD-D	CAD-A	55	0	0	N	N	Y	N	N	N	CT	CT	TT	CT	AA	GG	GG	CC	GG	TT	CC	AA	AA	AA	CT	GG	CC
24	CAD	CAD-D	CAD-A	57	3	4	N	N	Y	N	N	N	CT	CT	CT	CT	GA	GG	GG	CT	GG	TT	CT	AA	AA	AG	CT	GG	CC
25	CAD	CAD-D	CAD-A	55	0	2	Y	N	Y	N	N	N	CT	CC	CT	CT	GA	GA	GC	CT	AG	TC	CC	AG	AT	AA	CT	GA	CT
26	CAD	CAD+D	CAD-A	42	2	7	Y	N	Y	N	N	N	CC	CT	TT	CC	AA	GA	GC	CT	AA	TC	CC	AG	AT	AG	CT	GG	CT
27	CAD	CAD+D	CAD-A	52	2	7	N	N	N	N	N	N	TT	CC	CC	CT	GG	GA	GC	CT	GG	TT	CT	AA	AA	AA	TT	AA	CT
28	CAD	CAD-D	CAD-A	60	0	0	Y	Y	Y	Y	Y	N	CC	CT	TT	CC	GA	GA	GC	TT	AG	TC	CT	AA	AA	AA	CT	GA	CT
29	CAD	CAD-D	CAD-A	64	0	0	N	N	Y	N	N	N	CT	CT	CT	CT	GA	AA	CC	TT	AG	TC	CC	AA	AA	AA	CC	AA	CC
30	CAD	CAD+D	CAD-A	51	0	9	Y	N	N	N	N	Y	TT	CC	CC	CC	AA	AA	CC	TT	AA	CC	CT	GG	TT	AA	CT	GA	CC
31	CAD	CAD-D	CAD-A	58	2	1	Y	N	Y	N	N	N	CT	CC	CC	CC	AA	GA	GC	CT	AA	TC	CC	AA	AA	AA	CC	GA	CC
32	CAD	CAD-D	CAD-A	75	3	2	N	N	Y	N	N	N	TT	CC	CT	CT	GA	GA	GC	CT	AA	TC	CC	AA	AA	AA	CT	GA	CT
33	CAD	CAD+D	CAD-A	55	1	9	N	N	Y	N	N	Y	CT	CT	CC	CC	AA	GG	GG	CC	GG	TT	CC	AA	AA	AA	CT	GG	CT
34	CAD	CAD+D	CAD+A	40	7	9	N	N	N	N	N	N	CC	TT	CC	CT	GA	GA	GC	CT	GG	TT	CC	AA	AA	AA	CC	GA	CC
35	CAD	CAD+D	CAD-A	73	1	7	Y	N	N	N	N	N	CT	CC	CT	CC	AA	AA	CC	TT	AG	TC	CC	AG	AA	AG	CT	GA	CC
36	CAD	CAD+D	CAD+A	68	8	5	N	N	N	Y	N		CT	CT	CT	CT	GG	GA	GC	CT	GG	TT	CC	AG	AT	AA	CT	GA	CT
37	CAD	CAD+D	CAD-A	54	4	5	Y	Y	Y	N	N	Y	CT	CC	CC	CC	AA	GA	GC	TT	AG	TC	CC	AG	AT	AA	TT	GA	TT
38	CAD	CAD+D	CAD+A	52	17	9	N	N	N	N	N	Y	CT	CT	CT	CC	GA	GG	GG	CC	GG	TT	CC	AA	AA	AA	CT	GA	CC
39	CAD	CAD-D	CAD-A	70	2	3	N	N	Y	N	N	N	CT	CT	TT	CC	GA	GG	GG	CC	GG	TT	CT	AA	AA	AA	CC	GG	CC
40	CAD	CAD-D	CAD-A	67	1	3	Y	Y	Y	N	Y	N	CT	CT	CT	CT	GG	GA	GC	TT	AG	TC	CC	AA	AA	AG	CT	GG	CT
41	CAD	CAD-D	CAD-A	73	2	2	Y	Y	Y	N	N	N	CC	TT	CT	CT	GG	GA	GC	CT	AA	TC	CT	AA	AA	AG	CT	GG	CC
42	CAD	CAD-D	CAD-A	64	1	1	N	N	Y	N	N	N	CC	CC	TT	CC	AA	GA	GC	CT	AG	TC	CC	AG	AA	AA	CC	GG	CC
43	CAD	CAD-D	CAD-A	42	2	2	N	N	Y	N	Y	N	CT	CT	CT	CT	GG	GA	GC	CT	AG	TC	CC	AG	AA	AA	CT	GG	CT
44	CAD	CAD+D	CAD-A	64	0	6	Y	Y	N	N	N	N	CT	CC	CT	CT	GA	GA	GC	CT	AA	TC	CC	AA	AA	AA	CC	GG	CC
45	CAD	CAD-D	CAD-A	53	0	0	N	N	Y	N	N	Y	CC	CT	TT	CC	GA	GA	GC	CT	GG	TT	CT	AG	AT	AA	CT	GA	CC
46	CAD	CAD+D	CAD+A	64	7	12	N	N	Y	N	N	N	CT	CT	CT	CT	GA	GG	GG	CC	GG	TT	CC	AG	AT	AA	CT	GA	CC
47	CAD	CAD-D	CAD-A	64	0	0	N	N	Y	N	N	N	CC	CT	CC	CT	GG	GA	GC	CT	AG	TC	CT	AA	AA	AA	TT	GG	CC
48	CAD	CAD-D	CAD-A	83	2	4	N	N	Y	N	Y	N	CC	CT	CT	CT	GA	AA	CC	TT	AA	CC	CC	AA	AA	AA	TT	AA	CT
49	CAD	CAD+D	CAD+A	74	5	9	N	N	Y	N	N	N	CC	CT	CC	CT	GG	GA	GC	CT	GG	TT	CC	AA	AA	AG	CT	GG	CC
50	CAD	CAD+D	CAD-A	73	0	11	N	N	N	N	Y	Y	CC	TT	TT	TT	GG	AA	CC	TT	AA	CC	CT	AG	AT	AA	CT	GA	CT
51	CAD	CAD+D	CAD-A	79	0	8	N	N	Y	Y	N	Y	CC	TT	TT	CT	GG	GG	GG	CC	GG	TT	CC	AG	AT	AA	CT	GG	CC
52	CAD	CAD+D	CAD-A	51	0	9	Y	Y	Y	N	N	Y	CC	CC	CT	CT	GA	GA	GC	CT	GG	TT	CC	AG	AT	AA	CC	GG	CT
53	CAD	CAD-D	CAD-A	42	0	1	Y	Y	Y	N	N	N	CC	CT	CT	CC	GG	GG	GG	CC	GG	TT	CC	AA	AA	AA	CC	GG	CT
54	CAD	CAD+D	CAD-A	51	4	8	N	N	Y	N	N	N	CC	CT	CT	CT	GA	GA	GC	CT	GG	TT	CT	AG	AT	AG	CT	GG	CC
55	CAD	CAD-D	CAD-A	61	1	4	Y	Y	Y	N	Y	N	CT	CT	CC	CC	AA	GA	GC	CT	GG	TT	CC	AG	AA	AG	CT	GG	CT
56	CAD	CAD-D	CAD-A	44	0	3	N	N	Y	N	N	N	CC	TT	CC	CC	GA	GA	GC	CT	AG	TC	CT	AA	AA	AA	CC	GG	CT
57	CAD	CAD-D	CAD-A	50	1	0	N	Y	Y	N	N	Y	CT	CT	CC	CC	AA	GA	GC	TT	GG	TT	TT	AA	AA	AA	CC	GG	CC
58	CAD	CAD+D	CAD-A	62	7	6	Y	N	Y	N	N	N	TT	CC	CT	CT	GA	GA	GC	CT	AA	TC	CC	AG	AT	AG	TT	GA	CC
59	CAD	CAD+D	CAD-A	60	3	5	N	N	Y	Y	N	N	CC	CT	TT	CC	AA	GA	GC	CT	GG	TT	CC	AA	AA	AA	CC	GG	TT
60	CAD	CAD+D	CAD+A	67	8	11	N	N	Y	N	N	N	CC	CT	CT	CC	GA	AA	CC	TT	AA	CC	CT	AA	AA	AA	CT	GG	CC
61	CAD	CAD+D	CAD-A	50	3	5	Y	Y	Y	N	Y	N	CT	CC	CC	CC	AA	GA	GC	CT	AG	TC	CC	AG	AT	AA	CT	GA	CC
62	CAD	CAD-D	CAD-A	36	0	4	N	Y	Y	N	N	N	TT	CC	CT	CC	GA	GA	GC	CT	GG	TT	CT	AA	AA	AA	CT	GA	CC
63	CAD	CAD+D	CAD-A	32	2	10	N	N	Y	N	N	N	CT	CT	CT	CT	GA	AA	CC	TT	AG	TC	CT	AG	AA	AA	CC	GG	CC
64	CAD	CAD+D	CAD+A	53	7	11	N	N	Y	Y	N	N	CC	TT	CT	CC	GA	GA	GC	TT	GG	TT	CC	AG	AT	AA	CT	GG	CT
65	CAD	CAD-D	CAD-A	44	0	0	N	Y	Y	N	Y	N	CT	CT	CT	CC	AA	GA	GC	CT	AA	TC	CT	AA	AA	AA	CC	GG	CC
66	CAD	CAD-D	CAD-A	51	2	3	N	N	Y	N	N	Y	CC	CC	CT	CC	GA	AA	CC	TT	AA	CC	CT	GG	TT	AA	CT	GA	CC
67	CAD	CAD+D	CAD-A	50	0	7	N	N	N	Y	N	N	CT	CC	CT	CT	GA	GA	GC	CT	GG	TT	CC	AA	AA	AG	TT	GA	CT
68	CAD	CAD+D	CAD+A	40	7	12	N	N	N	N	N	N	CT	CC	TT	CC	GA	GA	GC	CT	AA	TC	CC	AA	AA	AG	CT	GG	CC
69	CAD	CAD-D	CAD-A	53	0	1	Y	Y	Y	N	N	N	CC	CT	CC	CC	GA	GA	GC	CT	AA	TC	CT	AA	AA	AG	CT	GG	CC
70	CAD	CAD+D	CAD+A	59	5	5	N	N	Y	Y	Y	N	CT	CT	TT	CC	AA	GG	GG	CC	GG	TT	CC	AA	AA	AA	CT	GA	CT
71	CAD	CAD+D	CAD-A	79	4	7	N	Y	N	Y	N	N	CC	CT	CT	CT	GA	GA	GC	CT	AG	TC	CT	AG	AT	AA	TT	AA	CC
72	CAD	CAD-D	CAD-A	64	0	0	N	N	Y	N	N	Y	CC	CT	TT	CT	GA	GA	GC	TT	AG	TC	CT	AA	AA	AA	CC	GA	CC
73	CAD	CAD+D	CAD-A	60	0	6	N	N	Y	Y	Y	N	CT	CC	CT	CT	AA	GG	GG	CC	GG	TT	CT	AA	AA	AG	TT	GA	CC
74	CAD	CAD-D	CAD-A	46	1	2	N	N	Y	N	N	N	TT	CC	CT	CT	GA	AA	CC	TT	AA	CC	CC	AA	AA	AG	TT	GG	CC
75	CAD	CAD+D	CAD-A	60	2	15	N	N	Y	Y	N	N	CT	CC	CC	CT	GA	GA	GC	CT	GG	TT	CC	AA	AA	AA	CC	GG	CC
76	CAD	CAD+D	CAD-A	54	3	10	Y	Y	Y	Y	N	N	CT	CC	CT	CT	GA	GA	GC	CT	GG	TT	CC	AA	AA	AA	CT	GG	CC
77	CAD	CAD+D	CAD+A	52	13	9	N	N	N	Y	N	N	CC	CT	CT	CT	GA	GA	GC	CT	AA	TC	CC	AA	AA	AG	CT	GG	CC
78	CAD	CAD-D	CAD-A	47	0	1	Y	Y	Y	N	N	N	CT	CC	CT	TT	GG	AA	CC	TT	GG	TT	CC	AG	AT	AG	CT	GG	CC
79	CAD	CAD-D	CAD-A	49	3	0	Y	Y	Y	Y	Y	N	CC	CT	CC	CT	GA	GG	GG	CC	GG	TT	CT	AA	AA	AG	CT	GG	CC
80	CAD	CAD+D	CAD-A	51	0	6	N	N	N	N	N	N	CC	TT	CC	CT	GA	GA	GC	CT	AA	TC	CC	AG	AT	AG	CT	GG	CT
81	CAD	CAD+D	CAD-A	61	3	6	Y	Y	Y	N	N	N	CT	CC	CC	CT	GA	AA	CC	TT	AA	CC	CT	AA	AA	AA	CT	GA	CC
82	CAD	CAD+D	CAD-A	62	4	5	N	N	Y	N	N	N	CC	TT	CT	CC	GG	AA	CC	TT	AG	TC	CT	AG	AT	AG	CT	GG	CT
83	CAD	CAD-D	CAD-A	66	3	2	N	N	Y	Y			CC	CT	CT	CC	AA	AA	CC	TT	AA	CC	CT	AG	AT	AA	CT	GG	CC
84	CAD	CAD-D	CAD-A	68	4	3	N	N	Y	N	Y	N	CC	TT	CT	CT	GA	AA	CC	TT	AG	TC	CC	AA	AA	AG	TT	GA	CC
85	CAD	CAD+D	CAD-A	69	2	6	Y	Y	Y	N	N	N	CT	CT	CT	CT	GA	GG	GG	CC	GG	TT	CC	AA	AA	AG	TT	GG	CC
86	CAD	CAD+D	CAD-A	64	0	8	N	N	N	N	N	Y	CC	CC	CT	CT	GG	AA	CC	TT	AA	CC	CT	AA	AA	AA	CT	GA	CC
87	CAD	CAD+D	CAD+A	56	7	8	Y	Y	N	N	N	N	CC	CT	CT	TT	GA	GG	GG	CC	GG	TT	CC	AA	AA	AA	TT	AA	CC
88	CAD	CAD-D	CAD-A	70	0	0	Y	Y	Y	N	N	N	TT	CT	CC	TT	GA	GG	GG	CC	GG	TT	CT	AG	AT	AA	CC	GA	CC
89	CAD	CAD+D	CAD-A	78	0	10	N	N	Y	N	Y	N	CC	TT	CC	CC	AA	AA	CC	TT	AA	CC	CC	AG	AT	AG	CT	GG	CC
90	CAD	CAD-D	CAD-A	67	2	2	N	N	Y	N	N	N	CT	CT	CT	CT	GA	AA	CC	TT	AG	TC	CT	AA	AA	AG	TT	GA	CC
91	CAD	CAD-D	CAD-A	61	3	4	N	N	Y	N	N	N	CC	CT	CT	CC	AA	GA	GC	CT	AG	TC	CT	AA	AA	AG	CT	GA	CC
92	CAD	CAD+D	CAD-A	50	1	5	N	Y	Y	N	N	N	CT	CC	CC	CT	GA	GG	GG	CC	GG	TT	CC	AA	AA	AG	TT	GA	CC
93	CAD	CAD-D	CAD-A	33	0	2	Y	Y	Y	N	N	N	CT	CC	CT	CC	AA	GA	GC	TT	AG	TC	CC	AA	AA	AA	CC	GG	CC
94	CAD	CAD+D	CAD-A	57	0	6	N	N	N	N	Y	N	CT	CT	CC	CT	GA	AA	CC	TT	AA	CC	CT	AG	AA	AA	CT	GG	CT
95	CAD	CAD-D	CAD-A	47	5	0	N	N	Y	N	N	N	CC	CT	CT	CT	GA	GA	GC	CC	AA	TC	CC	AA	AA	AG	TT	GG	CC
96	CAD	CAD+D	CAD-A	46	1	5	Y	Y	N	N	N	N	CC	CT	TT	CC	AA	GA	GC	CT	AG	TC	CC	AA	AA	AA	CC	GG	CC
97	CAD	CAD+D	CAD-A	62	4	8	N	N	Y	N	Y	N	CC	TT	CC	CT	GG	GA	GC	CT	AA	TC	CC	AG	AT	AA	TT	AA	CC
98	CAD	CAD+D	CAD+A	66	8	13	N	N	N	N	N	N	CT	CC	CC	CT	GG	GA	GC	CT	AG	TC	CC	AA	AA	AA	CT	AA	CT
99	CAD	CAD-D	CAD-A	59	0	0	N	N	Y	N	N	N	CT	CT	TT	CT	GA	AA	CC	TT	AG	TC	TT	AG	AA	AA	CC	GG	CT
100	CAD	CAD-D	CAD-A	66	0	1	N	Y	Y	N	N	N	TT	CC	CT	CT	GG	GA	GC	CT	GG	TT	CT	AA	AA	AG	TT	GG	CC
101	CAD	CAD-D	CAD-A	50	0	1	N	N	Y	N	N	Y	CC	CT	CC	CC	AA	GG	GG	CC	GG	TT	CC	AA	AA	AG	CT	GG	CT
102	CAD	CAD-D	CAD-A	60	0	4	N	N	Y	N	N	N	TT	CC	CT	CT	AA	GA	GC	CT	GG	TT	CT	AA	AA	AG	TT	GA	CT
103	CAD	CAD-D	CAD-A	66	4	2	N	N	Y	Y	N	N	CC	CT	CC	CT	GA	GG	GG	CC	GG	TT	CC	AG	AT	AA	TT	AA	CT
104	CAD	CAD-D	CAD-A	63	0	1	Y	Y	Y	N	N	N	CC	TT	CT	CT	GA	AA	CC	TT	AG	TC	CC	AG	AT	GG	TT	GG	CT
105	CAD	CAD-D	CAD-A	51	0	0	N	Y	Y	Y	N	N	CT	CC	CC	TT	GA	GG	GG	CT	GG	TT	CC	AG	AT	AA	CT	GA	CC
106	CAD	CAD+D	CAD-A	54	0	5	N	N	N	N	N	N	CT	CT	CT	CC	GA	GG	GG	CC	GG	TT	CT	AG	AT	AA	CC	GG	CT
107	CAD	CAD-D	CAD-A	62	0	1	N	N	Y	N	N	N	CT	CT	TT	CT	GA	AA	CC	TT	AA	CC	CT	AA	AA	AA	CT	AA	CC
108	CAD	CAD+D	CAD+A	33	14	19	N	N	Y	N	N	N	CC	CC	CC	CC	GA	AA	CC	TT	AG	TC	CC	AA	AA	GG	TT	GG	CC
109	CAD	CAD+D	CAD+A	68	7	9	N	N	N	Y	Y	Y	CT	CT	CT	CC	GA	GA	GC	CT	AA	TC	CC	AA	AA	AG	CT	GA	CC
110	CAD	CAD+D	CAD+A	74	15	19	N	N	N	N	N	Y	CC	TT	CT	CC	GA	GA	GC	CT	AG	TC	CT	AG	AT	AG	CT	GG	CT
111	CAD	CAD+D	CAD+A	60	8	14	N	N	Y	N	N	N	CT	CT	CC	CT	GA	GG	GG	CT	GG	TT	TT	AA	AA	AA	CC	GG	CT
112	CAD	CAD+D	CAD+A	62	5	17	N	N	Y	N	N	N	CC	CT	CC	CT	GA	GA	GC	CT	AG	TC	CC	AA	AA	AA	CC	GG	CC
113	CAD	CAD-D	CAD-A	46	1	4	Y	Y	Y	Y	N	N	CC	CT	TT	CC	AA	GA	GC	CT	AG	TC	CC	AA	AA	AA	CC	GG	CC
114	CAD	CAD-D	CAD-A	48	3	0	N	Y	Y	N	N	N	CT	CT	TT	CT	GA	GA	GC	CT	AG	TC	CC	AA	AA	AA	CT	GA	CC
115	CAD	CAD+D	CAD-A	58	2	6	N	N	Y	Y	N	N	CC	CT	TT	CT	GA	GG	GG	CT	GG	TT	TT	AA	AT	AA	CC	GG	CC
116	CAD	CAD-D	CAD-A	51	0	0	Y	Y	Y	N	N	N	CT	CT	CC	CT	GA	GA	GC	CT	GG	TT	CT	AG	AT	AA	CT	GG	CT
117	CAD	CAD+D	CAD+A	51	21	8	N	N	Y	N	N	N	CT	CC	CT	CC	GG	GA	GC	CT	AG	TC	CC	AA	AA	AA	CC	GG	CT
118	CAD	CAD-D	CAD-A	81	0	3	N	N	Y	N	N	N	TT	CC	CC	CC	GA	GG	GG	CT	GG	TT	CC	AA	AA	AA	CC	GG	CT
119	CAD	CAD-D	CAD-A	73	2	1	N	N	Y	Y	N	N	CC	CT	CT	CC	AA	GG	GG	CC	GG	TT	CC	AA	AA	AG	TT	GG	CT
120	CAD	CAD+D	CAD-A	67	1	8	N	N	N	N	N	Y	CC	CT	CT	CT	GA	GG	GG	CT	GG	TT	CT	AA	AA	AG	CT	GG	CC
121	CAD	CAD-D	CAD-A	61	0	0	N	N	Y	N	N	N	CT	CC	TT	CC	AA	AA	CC	TT	AG	TC	CT	AG	AA	GG	TT	GG	CC
122	CAD	CAD+D	CAD+A	47	5	5	N	Y	Y	N	N	N	CC	CT	TT	TT	GG	GA	GC	CT	AG	TC	CC	AA	AA	AA	CC	GA	CC
123	CAD	CAD-D	CAD-A	48	2	2	N	N	Y	N	N	N	CT	CC	CT	CT	GA	GG	GG	CC	GG	TT	CC	AA	AA	AA	TT	GA	CC
124	CAD	CAD-D	CAD-A	50	0	0	N	Y	Y	N	N	N	CC	TT	CT	CC	GA	GG	GG	CC	GG	TT	CT	AA	AA	AA	TT	GA	CC
125	CAD	CAD-D	CAD-A	68	1	1	N	N	Y	Y	N	N	CT	CC	CT	CT	GA	GA	GC	CT	AA	CC	CC	AG	AT	AA	CC	GG	CC
126	CAD	CAD+D	CAD+A	59	8	7	N	N	Y	N	N	N	CC	CT	CC	CT	GA	AA	CC	TT	AA	CC	CC	AG	AA	AA	CT	GA	TT
127	CAD	CAD-D	CAD-A	53	0	3	N	Y	Y	N	N	Y	CC	TT	CC	CC	GA	GA	GC	CC	AA	TC	CT	AA	AA	AA	CC	GG	TT
128	CAD	CAD-D	CAD-A	69	1	2	Y	Y	Y	N	N	N	TT	CC	CC	TT	GG	GA	GC	CT	AG	TC	CT	GG	TT	AA	CC	AA	CC
129	CAD	CAD+D	CAD-A	64	3	5	N	N	Y	N	Y	N	CC	CT	CT	CT	GG	AA	CC	TT	AA	CC	CT	AA	AA	AA	CC	GA	CT
130	CAD	CAD+D	CAD+A	60	13	9	Y	Y	Y	N	N	Y	CC	CT	CT	CC	GA	GA	GC	CT	AG	TC	CT	AA	AA	AA	CT	GA	CC
131	CAD	CAD+D	CAD-A	71	4	8	N	N	N	N	N	Y	TT	CC	TT	CT	GG	AA	CC	TT	AG	TC	CT	AA	AA	AA	TT	GA	CC
132	CAD	CAD-D	CAD-A	60	1	3	N	N	Y	N	N	Y	CT	CT	CT	CC	GA	AA	CC	TT	AA	CC	CC	AA	AA	AG	TT	GG	CC
133	CAD	CAD-D	CAD-A	45	2	4	Y	Y	Y	N	N	Y	CC	CC	CT	CC	AA	GG	GG	CC	GG	TT	CC	AA	AA	AA	CT	GA	CT
134	CAD	CAD-D	CAD-A	56	0	2	N	Y	Y	N	N	N	CC	CC	TT	CT	GA	AA	CC	TT	AA	CC	CC	AA	AA	AA	CT	GG	CT
135	CAD	CAD-D	CAD-A	60	2	0	N	N	Y	N	N	Y	CT	CT	CC	CT	GA	GG	GG	CC	GG	TT	CT	AA	AA	AG	CT	GG	CC
136	CAD	CAD+D	CAD-A	68	0	6	N	N	N	Y	N	N	TT	CC	CT	CT	AA	AA	CC	TT	GG	TT	CC	AA	AA	AA	CC	GG	CT
137	CAD	CAD-D	CAD-A	45	0	0	Y	Y	Y	N	N	N	CT	CT	CT	TT	GG	GA	GC	TT	AG	TC	CC	AA	AA	AA	CT	GA	CT
138	CAD	CAD+D	CAD-A	65	2	7	Y	Y	N	N	N	Y	CC	TT	CT	CC	GA	GA	GC	CT	AG	TC	CC	AA	AA	AA	CC	GA	CC
139	CAD	CAD+D	CAD-A	54	1	6	N	N	Y	N	N	N	CT	CT	TT	CT	GA	GG	GG	CC	GG	TT	CC	AG	AT	AA	CC	GA	CT
140	CAD	CAD+D	CAD+A	59	5	8	N	N	Y	N	Y	Y	CT	CT	CC	CT	GA	AA	CC	TT	AG	TC	CC	AA	AA	AG	CT	GA	CT
141	CAD	CAD-D	CAD-A	52	0	1	Y	Y	Y	N	N	Y	CC	TT	CT	CC	GA	GA	GC	CT	AA	TC	TT	AG	AT	AG	CT	GG	CT
142	CAD	CAD+D	CAD-A	61	3	7	N	N	Y	N	N	Y	TT	CC	CT	CC	GG	GA	GC	CT	AG	TC	CC	AG	AA	AA	TT	AA	CT
143	CAD	CAD-D	CAD-A	55	3	2	N	N	Y	Y	N	N	CT	CC	CT	CC	AA	GG	GG	CT	GG	TT	CC	AA	AA	AA	CC	GA	CC
144	CAD	CAD+D	CAD+A	65	8	16	N	N	N	N	Y	Y	CC	CT	CT	CT	GG	GA	GC	CT	AA	TC	CC	AA	AA	GG	CT	GG	CC
145	CAD	CAD-D	CAD-A	64	2	3	N	N	Y	N	N	Y	CT	CT	CT	TT	GA	GG	GG	CC	AG	TT	CC	AG	AT	AA	CC	GG	CC
146	CAD	CAD-D	CAD-A	73	2	4	Y	N	Y	N	Y	Y	CC	CC	CT	CC	GG	GA	GC	CT	AG	TC	CC	AA	AA	AA	CT	GA	CT
147	CAD	CAD+D	CAD-A	39	2	5	N	N	Y	N	N	Y	CT	CT	TT	CC	AA	AA	CC	TT	AA	CC	CC	AA	AA	AA	CT	GA	CT
148	CAD	CAD+D	CAD-A	53	1	5	N	N	N	N	N	Y	CT	CC	CT	CT	GA	AA	CC	TT	AA	CC	CT	AG	AT	GG	TT	GG	CC
149	CAD	CAD-D	CAD-A	69	0	3	N	N	Y	N	Y	Y	TT	CC	CC	CC	AA	GG	GG	CC	GG	TT	CC	AG	AT	AG	TT	GA	CT
150	CAD	CAD-D	CAD-A	63	1	2	N	N	Y	N	N	Y	TT	CC	CT	CC	GG	GG	GG	CT	GG	TT	CC	AA	AA	AA	CT	AA	CT
151	CAD	CAD-D	CAD-A	61	0	0	N	N	Y	N	N	N	CC	CT	CT	CC	AA	GG	GG	CC	GG	TT	CC	AA	AA	AA	CC	GG	CC
152	CAD	CAD-D	CAD-A	60	2	0	N	N	Y	Y	N	N	CT	CT	CT	CC	GG	AA	CC	TT	AG	TC	CC	AA	AA	AA	CT	GA	CT
153	CAD	CAD+D	CAD-A	63	3	6	N	N	Y	N	N	Y	TT	CC	CT	CT	GA	GA	GC	TT	GG	TT	CT	AG	AT	AG	CT	GG	TT
154	CAD	CAD-D	CAD-A	54	3	3	N	N	Y	N	N	N	CT	CC	CC	CT	GA	GG	GG	CC	GG	TT	CC	AG	AA	AA	CT	GA	CT
155	CAD	CAD-D	CAD-A	49	2	4	N	N	Y	N	N	Y	CT	CT	CT	CC	GA	AA	CC	TT	AA	CC	CT	AA	AA	AA	TT	AA	CT
156	CAD	CAD-D	CAD-A	74	3	2	N	N	Y	N	Y	Y	CT	CC	CC	CC	AA	GA	GC	CT	AG	TC	CC	AG	AT	AA	CT	GA	CC
157	CAD	CAD-D	CAD-A	53	1	2	Y	N	Y	N	N	N	TT	CC	CT	CT	GG	GG	GG	CT	GG	TT	CT	AA	AA	AA	CT	GA	CC
158	CAD	CAD+D	CAD-A	65	1	7	Y	N	N	Y	N	Y	CC	TT	CC	CC	GA	GA	GC	CT	GG	TT	CT	AG	AT	AA	TT	GG	CC
159	CAD	CAD+D	CAD+A	58	6	5	Y	Y	N	N	N	Y	CT	CC	CT	TT	GG	GA	GC	CT	AA	TC	CC	AG	AT	AG	TT	GA	CC
160	CAD	CAD+D	CAD-A	82	3	5	N	N	Y	N	N	Y	TT	CC	TT	CC	AA	GA	GC	CT	AG	TC	CC	AA	AA	AA	CC	GA	CC
161	CAD	CAD-D	CAD-A	38	1	3	N	N	Y	Y	N	N	TT	CC	CT	CT	GA	AA	CC	TT	AG	TC	CT	AA	AA	AA	CC	GG	CC
162	CAD	CAD+D	CAD-A	60	0	9	N	N	N	N	Y	Y	CC	CT	CT	CT	GG	AA	CC	TT	AA	CC	CT	AA	AA	AA	CC	GG	CC
163	CAD	CAD-D	CAD-A	57	1	1	Y	Y	Y	N	N	N	CT	CT	CT	CC	GA	GA	GC	TT	AG	TC	CT	AA	AA	AA	CC	GG	CT
164	CAD	CAD+D	CAD-A	86	4	10	Y	Y	N	N	N	N	TT	CC	CC	CT	GA	GG	GG	CT	GG	TT	CC	AA	AA	AG	TT	GA	CC
165	CAD	CAD+D	CAD-A	41	0	5	N	N	Y	N	Y	Y	CC	TT	CC	CC	GA	GA	GC	CT	AA	TC	CC	AG	AA	AG	CT	GG	CC
166	CAD	CAD-D	CAD-A	40	0	0	N	N	Y	Y	N	N	CC	CT	CC	CT	GA	AA	CC	TT	AA	CC	TT	AG	AT	AA	CC	GG	CT
167	CAD	CAD-D	CAD-A	45	0	1	N	N	Y	Y	N	N	CT	CT	CT	CT	GA	GA	GC	CT	AA	TC	CC	AG	AA	AG	CT	GG	CC
168	CAD	CAD+D	CAD+A	68	8	9	N	N	N	Y	N	Y	CT	CC	CT	CT	GA	GA	GC	CT	AG	TC	CC	AG	AT	AA	CT	GA	CC
169	CAD	CAD+D	CAD-A	61	2	9	N	N	N	Y	N	Y	CC	CT	CC	CC	AA	GA	GC	CT	AA	TC	TT	GG	TT	AA	CC	GG	CC
170	CAD	CAD+D	CAD+A	68	10	7	N	N	N	N	N	Y	CT	CC	CC	CT	GA	AA	CC	TT	AG	TC	CC	AA	AA	AG	CT	GG	CC
171	CAD	CAD+D	CAD+A	62	5	5	N	N	Y	N	N	N	CT	CT	CC	CC	AA	GG	GG	CC	GG	TT	CC	AA	AA	AG	CT	GG	CC
172	CAD	CAD+D	CAD-A	53	1	6	Y	Y	N	N	N	Y	CC	TT	CT	TT	GG	GA	GC	CT	AA	TC	CT	AG	AT	AA	CC	GG	CT
173	CAD	CAD-D	CAD-A	53	7	1	N	N	Y	N	Y	N	CC	CT	TT	CT	GA	GG	GG	TT	GG	TT	CT	AA	AA	AA	TT	AA	TT
174	CAD	CAD-D	CAD-A	66	0	2	N	N	Y	N	N	Y	CT	CC	CT	CT	GA	AA	CC	TT	AG	TC	CC	AA	AA	AA	TT	AA	CC
175	CAD	CAD-D	CAD-A	51	2	1	N	N	Y	N	N	N	CC	CT	CT	CT	GG	GG	GG	CC	GG	TT	CC	AG	AT	AA	CT	GG	CC
176	CAD	CAD-D	CAD-A	66	1	3	Y	Y	Y	N	Y	Y	CT	CT	CT	CT	GA	GA	GC	TT	GG	TT	CC	AG	AT	AA	CC	GG	CC
177	CAD	CAD-D	CAD-A	56	2	3	N	N	Y	Y	Y	N	TT	CC	CT	CC	AA	AA	CC	TT	AA	CC	CC	AA	AA	AA	CT	GA	CT
178	CAD	CAD-D	CAD-A	80	1	1	Y	Y	Y	Y	Y	Y	CT	CT	CT	CC	AA	AA	CC	TT	GG	TT	CC	AA	AA	AA	CC	GG	TT
179	CAD	CAD-D	CAD-A	70	0	1	N	N	Y	N	Y	Y	TT	CC	CC	CT	GA	GA	GC	TT	AG	TC	CT	AG	AT	AA	CC	GA	CC
180	CAD	CAD-D	CAD-A	51	2	2	N	N	Y	N	N	N	CT	CC	CT	CT	GG	GA	GC	CT	GG	TT	CC	AA	AA	AA	TT	GA	TT
181	CAD	CAD-D	CAD-A	42	0	1	N	N	Y	N	Y	Y	TT	CC	CT	CC	GA	GG	GG	CC	GG	TT	CC	AA	AA	AG	CT	GG	TT
182	CAD	CAD-D	CAD-A	70	1	3	Y	Y	Y	N	N	Y	CT	CT	CT	CT	AA	GA	GC	CT	AA	TC	CC	AG	AT	AA	CC	GG	CT
183	CAD	CAD-D	CAD-A	57	1	1	Y	Y	Y	N	Y	N	CT	CT	CT	CT	GG	AA	CC	TT	AG	TC	CC	AA	AA	AA	CT	GA	CC
184	CAD	CAD-D	CAD-A	61	2	2	Y	Y	Y	N	Y	N	CT	CT	CT	CC	AA	AA	CC	TT	GG	TT	CT	AA	AA	AA	CC	GG	CT
185	CAD	CAD-D	CAD-A	47	0	0	Y	N	Y	N	N	N	CC	CT	CT	CC	GA	GA	GC	CT	AG	TC	CT	AG	AT	AA	CT	GG	CT
186	CAD	CAD-D	CAD-A	66	1	0	N	Y	Y	N	Y	N	TT	CC	CC	CC	GA	GA	GC	CT	AA	TC	CC	AA	AA	GG	CT	GG	CC
187	CAD	CAD-D	CAD-A	48	0	1	N	Y	Y	Y	N	Y	CC	CT	CT	CC	AA	GA	GC	CT	AG	TC	CC	AG	AT	AA	CC	GG	CT
188	CAD	CAD-D	CAD-A	61	0	2	N	N	Y	Y	N	N	CT	CC	CC	TT	GG	GA	GC	CT	AA	TC	CC	AA	AA	AA	CC	GG	CT
189	CAD	CAD-D	CAD-A	62	0	0	N	N	Y	N	N	N	CC	CT	CT	CC	GA	AA	CC	TT	GG	TT	CT	AG	AT	AA	TT	GA	CC
190	CAD	CAD-D	CAD-A	60	0	0	Y	Y	Y	N	N	N	CC	TT	CT	CC	GA	GG	GG	CC	GG	TT	CC	AG	AT	AA	CT	GA	CC
191	CAD	CAD-D	CAD+A	66	9	2	Y	Y	Y	N	N	Y	CT	CT	TT	CC	GA	GA	GC	TT	AG	TC	CC	AA	AA	AA	CT	GG	CC
192	CAD	CAD+D	CAD-A	76	3	5	Y	N	N	N	N	Y	CC	CT	CC	CT	GA	AA	CC	TT	AG	TC	CT	AA	AA	AG	CT	GG	CC
193	CAD	CAD-D	CAD-A	67	3	3	N	N	Y	Y	N	N	CT	CC	CT	CC	AA	GA	GC	CT	GG	TT	CT	AG	AT	AA	CT	GA	CT
194	CAD	CAD+D	CAD-A	60	0	8	Y	Y	N	N	N	N	CC	CC	CC	CT	GA	GA	GC	CT	GG	TT	CC	AA	AA	AA	CC	GG	CT
195	CAD	CAD-D	CAD-A	57	2	2	Y	Y	Y	N	Y	Y	CT	CC	CT	CC	GA	GA	GC	CT	AG	TC	CC	AA	AA	AA	CC	GG	CC
196	CAD	CAD+D	CAD+A	63	7	9	Y	N	Y	Y	Y	Y	CT	CT	CC	CT	GA	AA	CC	TT	AA	CC	CC	AA	AA	AA	CT	GA	CC
197	CAD	CAD-D	CAD-A	56	1	0	Y	Y	Y	N	N	N	CT	CC	CC	CC	GG	GA	GC	CT	AG	TC	CC	AA	AA	GG	TT	GG	CC
198	CAD	CAD+D	CAD-A	58	2	7	Y	Y	Y	N	N	N	TT	CC	CC	CT	GA	AA	CC	TT	AA	CC	CC	AA	AA	AG	CT	GG	CC
199	CAD	CAD+D	CAD+A	60	5	5	Y	Y	Y	N	N	Y	CT	CT	TT	CT	GG	GA	GC	TT	AG	TC	CT	AA	AA	AA	TT	AA	CT
200	CAD	CAD+D	CAD+A	44	6	9	N	Y	Y	N	N	Y	TT	CC	CT	CT	GA	AA	CC	TT	AG	TC	CC	GG	TT	AG	TT	GA	CC
201	CAD	CAD+D	CAD-A	71	2	5	N	N	N	Y	N	Y	TT	CC	CC	CT	GA	AA	CC	TT	AA	CC	CC	AA	AA	AA	CT	GA	CT
202	CAD	CAD-D	CAD-A	62	2	4	N	N	Y	Y	N	Y	CT	CT	CC	CC	GA	GA	GC	CT	AG	TC	CC	AG	AA	AA	CC	GA	CC
203	CAD	CAD-D	CAD-A	52	3	1	Y	Y	Y	N	N	Y	CC	TT	CT	TT	GG	GA	GC	TT	AG	TC	TT	AG	AT	AA	TT	AA	CC
204	CAD	CAD-D	CAD-A	54	0	0	Y	Y	Y	N	Y	N	CC	TT	CT	TT	GG	GG	GG	CT	GG	TT	CC	AA	AA	AA	CC	GG	CC
205	CAD	CAD-D	CAD-A	60	0	0	N	Y	Y	N	N	N	CT	CT	CT	CT	GA	AA	CC	TT	AA	CC	CC	AG	AT	AA	CC	GG	CT
206	CAD	CAD+D	CAD-A	53	1	9	N	Y	Y	N	Y	Y	CT	CT	TT	CC	GA	GA	GC	CT	AG	TC	CT	AG	AA	AG	CT	GG	TT
207	CAD	CAD-D	CAD-A	63	0	0	Y	Y	Y	N	N	N	TT	CC	CC	CT	GA	GA	GC	CT	AG	TC	CC	AA	AA	AA	CT	GA	CT
208	CAD	CAD+D	CAD-A	50	4	5	N	N	N	N	N	N	CT	CT	CC	CC	GA	AA	CC	TT	AA	CC	CT	AG	AT	GG	TT	GG	CT
209	CAD	CAD-D	CAD-A	66	2	1	Y	Y	Y	N	N	Y	TT	CC	CT	CT	GG	AA	CC	TT	AG	TC	CT	AA	AA	AA	TT	AA	CC
210	CAD	CAD-D	CAD-A	67	2	2	N	N	Y	N	N	N	CT	CT	CT	CC	AA	GA	GC	CT	AG	TC	CT	AA	AA	AA	TT	GA	CT
211	CAD	CAD+D	CAD+A	49	7	6	Y	Y	Y	N	N	Y	TT	CT	CC	CC	GA	GG	GG	CT	GG	TT	CC	AA	AA	AG	CT	GG	CC
212	CAD	CAD+D	CAD-A	55	1	6	N	N	N	N	N	N	CC	CT	TT	CT	GG	GG	GG	CC	GG	TT	CT	AG	AA	AA	CT	GA	CC
213	CAD	CAD-D	CAD-A	65	1	1	N	N	Y	N	N	N	TT	CC	TT	CT	GA	GG	GG	CT	GG	TT	CC	AG	AT	AG	CT	GG	CC
214	CAD	CAD-D	CAD-A	62	4	3	Y	Y	Y	N	N	Y	CC	CT	CT	CT	GG	AA	CC	TT	AA	CC	TT	AG	AT	AA	CT	GA	CC
215	CAD	CAD+D	CAD+A	48	10	7	Y	Y	Y	N	N	Y	CC	CT	CT	CC	AA	AA	CC	TT	AG	TC	CC	AA	AA	AA	CT	GG	CC
216	CAD	CAD+D	CAD+A	62	7	11	Y	Y	N	N	N	Y	CT	CT	CT	CC	GA	GA	GC	CT	AG	TC	CC	AA	AA	AA	CC	GG	CT
217	CAD	CAD-D	CAD-A	58	2	2	N	N	Y	Y	N	N	CT	CT	CC	CT	GG	GA	GC	TT	AG	TC	CC	AA	AA	AA	CT	GA	CC
218	CAD	CAD+D	CAD+A	72	5	12	N	N	N	N	N	Y	CC	CC	CC	TT	GG	GA	GC	TT	AG	TC	CC	AG	AT	AA	TT	AA	CT
219	CAD	CAD+D	CAD+A	83	14	9	N	N	Y	N	Y	Y	CC	CC	CT	CC	AA	GA	GC	CT	GG	TT	CC	AA	AA	AA	TT	GA	CT
220	CAD	CAD+D	CAD-A	54	3	9	N	N	N	N	N	N	TT	CC	CT	CT	GA	AA	CC	TT	AA	CC	CC	AA	AA	AA	CT	GA	CT
221	CAD	CAD-D	CAD-A	57	0	0	Y	Y	Y	N	N	N	CT	CC	CT	TT	GG	GA	GC	TT	GG	TT	CT	GG	TT	AA	CT	AA	CC
222	CAD	CAD-D	CAD-A	67	0	0	N	N	Y	N	N	N	CC	CC	CT	TT	GG	GG	GG	CC	GG	TT	CT	AG	AT	AA	CC	GG	CC
223	CAD	CAD+D	CAD-A	46	3	6	N	N	Y	N	N	Y	TT	CC	TT	CC	AA	GA	GC	CT	AA	TC	CT	AG	AA	AA	CT	GG	CC
224	CAD	CAD-D	CAD-A	70	0	4	N	N	Y	Y	Y	N	CT	TT	TT	CT	GA	AA	CC	TT	AG	TC	CT	AA	AA	AA	CC	GA	CC
225	CAD	CAD-D	CAD-A	54	0	3	N	N	Y	Y	N	Y	CT	CT	CT	CC	GA	AA	CC	TT	AG	TC	CT	AA	AA	AA	CC	GA	CT
226	CAD	CAD-D	CAD-A	58	1	0	N	N	Y	Y	N	N	CT	CC	CT	CC	AA	GG	GG	CT	GG	TT	TT	AG	AT	AA	TT	AA	CC
227	CAD	CAD-D	CAD-A	51	0	1	N	N	Y	N	Y	Y	CT	CT	TT	CC	AA	GG	GG	CC	GG	TT	CC	AG	AT	AA	CC	GA	CC
228	CAD	CAD-D	CAD-A	54	4	4	N	N	Y	N	Y	Y	TT	CC	TT	CT	GG	GG	GG	CC	GG	TT	CT	AG	AT	AA	CC	GG	CC
229	CAD	CAD-D	CAD-A	75	3	0	N	N	Y	N	N	N	CT	CC	CT	CT	GA	AA	CC	TT	AA	CC	CC	AA	AA	AG	TT	GG	CC
230	CAD	CAD+D	CAD-A	47	4	6	N	Y	N	Y	N	Y	CT	CC	CC	TT	GA	GA	GC	CT	AG	TC	CT	AA	AA	AA	CT	GA	CC
231	CAD	CAD+D	CAD-A	79	0	6	N	N	Y	N	N	Y	CT	CC	CT	CT	GG	AA	CC	TT	AA	CC	CC	AG	AA	AA	CT	GA	CT
232	CAD	CAD+D	CAD-A	81	2	5	N	N	Y	N	N	Y	CC	CC	CT	CT	GA	AA	CC	TT	AA	CC	CC	AA	AA	AA	CC	GG	CC
233	CAD	CAD-D	CAD-A	69	4	2	N	N	Y	Y	Y	Y	CC	CT	CT	CT	GA	GG	GG	CC	GG	TT	CC	AG	AT	AA	CT	GA	CC
234	CAD	CAD-D	CAD-A	56	3	4	Y	N	Y	N	Y	Y	CC	CT	CT	CC	GA	GA	GC	CT	AG	TC	CC	AA	AA	AA	CT	GA	CC
235	CAD	CAD-D	CAD-A	56	3	2	Y	Y	Y	N	N	N	TT	CC	CT	CC	AA	GA	GC	CT	AA	TC	CT	AG	AA	AG	CT	GA	CC
236	CAD	CAD+D	CAD-A	50	2	5	Y	Y	N	N	N	Y	CT	CC	TT	CC	GA	GA	GC	CT	AG	TC	CC	AG	AT	AA	CT	GA	CT
237	CAD	CAD-D	CAD-A	55	4	2	N	N	Y	N	N	N	TT	CC	CT	CT	GA	GA	GC	CT	AG	TC	CC	AG	AT	AA	CT	GA	CT
238	CAD	CAD+D	CAD+A	65	6	7	Y	Y	N	N	N	Y	CC	TT	CT	CT	GG	AA	CC	TT	AA	CC	CC	AA	AA	AA	CT	GG	TT
239	CAD	CAD+D	CAD-A	67	2	7	N	N	N	N	Y	N	TT	CC	TT	CT	GA	GA	GC	CT	GG	TT	CT	AA	AA	AA	CT	GA	CC
240	CAD	CAD-D	CAD-A	59	0	1	N	N	Y	N	N	N	CC	CT	CT	CC	GA	AA	CC	TT	AA	CC	CT	AA	AA	AG	TT	GA	CT
241	CAD	CAD-D	CAD-A	35	0	0	Y	Y	Y	N	N	N	CT	CC	CC	CT	GA	GA	GC	CT	AA	TC	CT	AA	AA	AG	CT	GG	CT
242	CAD	CAD+D	CAD-A	71	0	8	Y	Y	N	N	N	Y	CC	TT	CT	CT	GA	GA	GC	CT	AA	TC	TT	AA	AA	AA	CT	GA	CC
243	CAD	CAD-D	CAD-A	69	2	2	N	N	Y	N	N	Y	CT	CC	CC	CT	GG	AA	CC	TT	AA	CC	CT	AG	AT	AA	CC	GA	CC
244	CAD	CAD+D	CAD+A	45	11	13	N	Y	Y	N	N	Y	CT	CC	CT	CC	GA	AA	CC	TT	AA	CC	CT	AA	AA	AG	CT	GG	CC
245	CAD	CAD-D	CAD-A	47	3	4	Y	Y	Y	N	N	N	CT	CT	CT	CT	GG	GA	GC	CT	AA	TC	CC	AA	AA	AG	TT	AA	CT
246	CAD	CAD+D	CAD+A	53	6	7	N	N	Y	Y	N	Y	TT	CC	CT	CT	GA	GA	GC	CT	AG	TC	CC	AG	AT	AA	CC	GG	CC
247	CAD	CAD-D	CAD-A	55	1	1	N	N	Y	N	N	N	CC	CT	CT	CC	GA	AA	CC	TT	AG	TC	CT	AA	AA	AA	CT	GA	CT
248	CAD	CAD+D	CAD-A	76	3	7	Y	Y	N	N	Y	N	CT	CC	CT	CC	AA	GA	GC	CT	GG	TT	CC	AA	AA	AA	CC	GA	CT
249	CAD	CAD+D	CAD+A	63	9	8	N	N	N	N	N	N	CC	TT	CT	CC	GA	GA	GC	CT	AA	TC	CC	AA	AA	AA	CC	GG	CC
250	CAD	CAD-D	CAD-A	66	0	1	N	Y	Y	N	N	N	CT	CT	CC	CT	GA	GA	GC	CT	AA	TC	CC	AG	AT	AA	CC	GG	CC
251	CAD	CAD-D	CAD-A	50	2	3	Y	Y	Y	N	N	N	CT	CC	CT	CC	AA	GA	GC	CT	AG	TC	CC	AA	AA	AA	CT	GA	CT
252	CAD	CAD-D	CAD+A	56	7	4	Y	Y	Y	N	N	Y	CC	CT	CT	CC	GA	GA	GC	CT	AG	TC	CT	AG	AT	AA	CT	GG	CT
253	CAD	CAD+D	CAD-A	71	3	8	N	Y	N	N	Y	Y	CC	TT	CT	CC	GA	GA	GC	CT	AA	TC	CC	AA	AA	AG	CT	GG	CC
254	CAD	CAD-D	CAD-A	49	1	0	N	N	Y	N	N	N	CT	CT	CT	CT	GA	GG	GG	CC	GG	TT	CC	AA	AA	AG	TT	GA	CT
255	CAD	CAD+D	CAD+A	53	6	7	N	N	Y	N	N	Y	TT	CC	CC	CT	GA	GA	GC	CT	AG	TC	CC	AG	AT	AA	CC	GG	CC
256	CAD	CAD+D	CAD+A	61	13	8	N	N	Y	N	Y	N	CT	CC	CT	CT	GG	AA	CC	TT	AA	CC	CC	AG	AT	AA	CT	AA	CT
257	CAD	CAD+D	CAD+A	50	5	8	Y	N	N	N	N	Y	CT	CT	CT	CC	GA	AA	CC	TT	AA	CC	CC	AA	AA	AA	CT	GA	CC
258	CAD	CAD-D	CAD-A	49	1	3	N	N	Y	N	N	N	TT	CC	CC	CT	GA	GA	GC	TT	AG	TC	CT	AA	AA	AA	CC	GG	CC
259	CAD	CAD+D	CAD-A	39	2	5	Y	N	Y	N	Y	N	CC	TT	CT	CC	GG	AA	CC	TT	AA	CC	CT	AA	AA	AG	TT	GA	CC
260	CAD	CAD-D	CAD-A	68	0	2	Y	Y	Y	N	Y	N	TT	CC	CC	CT	GA	AA	CC	CT	AA	CC	CC	AG	AT	AG	CT	GG	CT
261	CAD	CAD+D	CAD-A	54	0	9	N	N	N	N	N	N	CT	CT	CC	CC	GG	GG	GG	CT	GG	TT	CC	AG	AA	AA	CC	GG	CC
262	CAD	CAD-D	CAD-A	62	2	1	N	N	Y	N	N	Y	CT	CC	CT	CC	AA	GA	GC	CT	AA	TC	CC	AA	AA	AA	CC	GA	CC
263	CAD	CAD-D	CAD-A	62	3	0	N	N	Y	N	N	N	CC	TT	CC	TT	GG	GA	GC	CT	AA	TC	TT	AG	AT	AG	CT	GG	CC
264	CAD	CAD+D	CAD+A	56	7	7	N	N	N	N	N	Y	CC	TT	CT	CC	GG	GG	GG	CC	GG	TT	CT	AA	AA	AA	CT	GA	CC
265	CAD	CAD+D	CAD+A	53	9	9	N	N	Y	N	N	Y	CC	CC	TT	CT	GA	GA	GC	CT	GG	TT	CC	AG	AT	AA	CT	AA	CT
266	CAD	CAD-D	CAD-A	61	2	2	Y	Y	Y	N	N	N	CT	CT	CC	CT	GG	GA	GC	CT	AA	TC	CC	AG	AA	AA	CT	GA	CC
267	CAD	CAD+D	CAD-A	63	2	6	Y	Y	N	N	Y	Y	CT	CC	CT	CC	AA	GA	GC	TT	AG	TC	CT	AG	AT	AA	CC	GG	CT
268	CAD	CAD-D	CAD-A	50	2	3	Y	Y	Y	N	N	N	CC	CC	CT	CC	AA	GA	GC	TT	AG	TC	CC	AG	AT	AA	CT	GA	CC
269	CAD	CAD+D	CAD+A	56	1	5	Y	Y	N	N	N	N	CT	CC	CC	CC	GA	GG	GG	CC	GG	TT	CC	AA	AA	AG	TT	GA	CC
270	CAD	CAD-D	CAD-A	64	2	2	Y	Y	Y	N	Y	N	TT	CC	CT	CT	GA	AA	CC	TT	AG	TC	CC	AA	AA	AA	CT	GA	CC
271	CAD	CAD-D	CAD-A	53	2	0	Y	Y	Y	Y	N	N	CC	CT	TT	CT	GA	GG	GG	CC	GG	TT	CC	AA	AA	AA	CC	GG	CC
1	CONTROL	CONTROL	CONTROL	44									CC	CT	TT	CT	GA	AA	CC	TT	AA	CC	CC	AG	AT	AG	CT	GG	CC
2	CONTROL	CONTROL	CONTROL	70									CT	CC	CC	TT	GG	AA	CC	TT	AG	TC	CC	GG	TT	AA	CC	GG	CC
3	CONTROL	CONTROL	CONTROL	80									CT	CC	CC	TT	GA	GA	GC	TT	GG	TT	CT	AA	AA	AG	CT	GG	CC
4	CONTROL	CONTROL	CONTROL	66									CT	CT	CT	TT	GG	AA	CC	TT	AA	CC	CC	AA	AA	AG	CT	GG	CC
5	CONTROL	CONTROL	CONTROL	81									TT	CC	CT	CC	GA	GA	GC	CT	AA	TC	CT	AA	AA	AA	CT	GA	CT
6	CONTROL	CONTROL	CONTROL	54									CT	CT	CC	CC	GA	GG	GG	CT	GG	TT	CC	AG	AT	AA	CT	GA	CC
7	CONTROL	CONTROL	CONTROL	67									CT	CC	CT	CC	AA	GA	GC	CT	AA	TC	CT	AG	AA	AA	TT	GA	CT
8	CONTROL	CONTROL	CONTROL	63									CC	CT	CT	CT	GA	AA	CC	TT	AA	CC	CT	AA	AA	AA	CT	GA	CC
9	CONTROL	CONTROL	CONTROL	47									CT	CT	CC	CC	AA	AA	CC	TT	AG	TC	CT	AG	AT	AA	CC	GG	CC
10	CONTROL	CONTROL	CONTROL	60									CT	CT	CC	CC	GA	GA	CC	TT	AA	CC	CC	AA	AA	AA	CC	GG	CC
11	CONTROL	CONTROL	CONTROL	60									CT	CT	CC	CT	GA	GA	GC	CT	AG	TC	CT	AA	AA	AA	CC	GG	CC
12	CONTROL	CONTROL	CONTROL	48									CT	CC	CC	CC	AA	GA	GC	CT	AA	TC	CC	GG	AT	AG	TT	GA	CT
13	CONTROL	CONTROL	CONTROL	56									CC	TT	CT	CC	GG	GA	GC	CT	AG	TC	CC	AA	AA	AA	CT	GA	CT
14	CONTROL	CONTROL	CONTROL	63									CT	CT	CC	CC	GA	GA	GC	CT	AG	TC	CT	AA	AA	AA	CT	GA	CT
15	CONTROL	CONTROL	CONTROL	81									TT	CC	CT	CT	GA	AA	CC	TT	AG	TC	CC	AA	AA	AA	CT	GA	CT
16	CONTROL	CONTROL	CONTROL	49									CC	TT	TT	CC	GG	GA	CC	TT	AA	CC	CC	AA	AA	AA	CT	GA	CC
17	CONTROL	CONTROL	CONTROL	69									CT	CT	TT	CT	GA	AA	CC	TT	AA	CC	CC	AG	AT	AA	TT	AA	CC
18	CONTROL	CONTROL	CONTROL	60									CC	TT	CT	CT	GA	GA	GC	CT	AA	TC	TT	AA	AA	AG	CT	GG	CC
19	CONTROL	CONTROL	CONTROL	57									TT	CC	CT	CT	GA	GG	GG	CT	GG	TT	CC	AA	AA	AG	CT	GG	CC
20	CONTROL	CONTROL	CONTROL	47									CT	CT	CT	CC	GA	GA	GC	CT	AA	TC	CC	GG	TT	AG	CT	GG	CC
21	CONTROL	CONTROL	CONTROL	76									CC	TT	CC	CT	GA	GG	GG	CC	GG	TT	CC	AA	AA	AG	CT	GG	CT
22	CONTROL	CONTROL	CONTROL	64									CC	TT	CT	CT	GA	AA	CC	TT	AA	CC	CC	AA	AA	AG	TT	GA	CC
23	CONTROL	CONTROL	CONTROL	50									CT	CC	CC	CT	GA	GG	GG	CC	GG	TT	CT	AG	AA	AA	TT	AA	TT
24	CONTROL	CONTROL	CONTROL	54									TT	CC	CT	CT	GG	AA	CC	TT	AG	TC	TT	AA	AA	AA	CC	GG	CC
25	CONTROL	CONTROL	CONTROL	49									CT	CT	CT	CT	GA	GG	GG	CC	GG	TT	CC	AA	AA	AG	TT	GA	CC
26	CONTROL	CONTROL	CONTROL	61									CT	CT	CT	CT	GA	AA	CC	TT	AA	CC	CT	AA	AA	AA	CT	GA	TT
27	CONTROL	CONTROL	CONTROL	61									TT	CC	TT	CT	GA	GA	GC	CT	GG	TT	CC	AA	AA	AA	CT	GA	CC
28	CONTROL	CONTROL	CONTROL	59									CC	CT	TT	CC	GG	GA	GC	CT	AG	TC	CC	GG	TT	AG	CT	GG	CC
29	CONTROL	CONTROL	CONTROL	60									CT	CC	CT	CC	GA	AA	CC	TT	AG	TC	CC	AG	AT	AA	CT	GA	CC
30	CONTROL	CONTROL	CONTROL	53									CC	CC	CT	CT	GA	AA	CC	TT	AA	CC	CC	AA	AA	AA	CT	GG	CT
31	CONTROL	CONTROL	CONTROL	46									CC	TT	CT	TT	GG	AA	CC	TT	AA	CC	CT	AA	AA	AA	TT	GA	CC
32	CONTROL	CONTROL	CONTROL	57									CT	CT	CT	CT	GG	GA	GC	CT	AA	TC	TT	AA	AA	AG	TT	GA	CT
33	CONTROL	CONTROL	CONTROL	55									CT	CT	CT	CT	GG	GA	GC	CT	AG	TC	CC	AA	AA	AG	CT	GG	CC
34	CONTROL	CONTROL	CONTROL	44									CT	CT	CT	CC	GA	AA	CC	TT	AA	CC	CT	AG	AT	AA	TT	GA	CC
35	CONTROL	CONTROL	CONTROL	58									CT	CC	CC	TT	GA	GA	GC	CT	GG	TT	CC	AA	AA	AA	CC	GA	CC
36	CONTROL	CONTROL	CONTROL	55									CT	CT	TT	CT	GA	GA	GC	CT	AA	TC	CC	GG	TT	AG	CT	GG	CC
37	CONTROL	CONTROL	CONTROL	56									CC	CC	CT	CT	GA	GA	GC	CT	GG	TT	CC	AG	AT	AG	CT	GG	CC
38	CONTROL	CONTROL	CONTROL	57									CT	CC	CC	CC	GG	GA	GC	CT	AA	TC	CT	AG	AT	AA	CC	GG	CC
39	CONTROL	CONTROL	CONTROL	55									CC	CT	CT	CC	AA	AA	CC	TT	AG	TC	CT	AA	AA	AA	CC	GA	CT
40	CONTROL	CONTROL	CONTROL	65									CT	CT	CT	CC	GA	GA	GC	CT	GG	TT	CC	AG	AT	AG	CT	GA	CC
41	CONTROL	CONTROL	CONTROL	47									CT	CT	TT	CC	GG	GA	GC	TT	AG	TC	CC	AA	AA	AA	CT	AA	CC
42	CONTROL	CONTROL	CONTROL	57									CT	CC	TT	CT	GG	GG	GG	CC	GG	TT	CC	AA	AA	AG	CT	GG	CC
43	CONTROL	CONTROL	CONTROL	74									CC	CC	CC	CT	GA	GA	GC	TT	GG	TT	CC	AA	AA	AG	CT	GG	CC
44	CONTROL	CONTROL	CONTROL	52									CT	CC	CC	CT	GA	AA	CC	TT	AA	CC	TT	AG	AT	AA	CC	GA	CT
45	CONTROL	CONTROL	CONTROL	56									CT	CT	TT	CT	GG	AA	CC	TT	AA	CC	CC	AG	AA	AA	CC	GG	CC
46	CONTROL	CONTROL	CONTROL	53									CT	CC	CT	CC	GA	AA	CC	TT	AG	TC	CT	AG	AT	AG	CT	GG	CC
47	CONTROL	CONTROL	CONTROL	50									CT	CC	CT	CC	AA	AA	CC	TT	AG	TC	CC	AA	AA	AG	TT	GA	CC
48	CONTROL	CONTROL	CONTROL	44									TT	CC	TT	CC	GA	GA	GC	CT	GG	TT	CC	AA	AA	AA	CT	GG	CC
49	CONTROL	CONTROL	CONTROL	62									CT	CT	CT	CT	GA	AA	CC	TT	AG	TC	CC	AA	AA	AA	CT	GA	CC
50	CONTROL	CONTROL	CONTROL	47									CC	TT	CC	CC	GG	AA	CC	TT	AA	CC	CC	AA	AA	AA	CC	GA	CC
51	CONTROL	CONTROL	CONTROL	65									TT	CC	CT	CC	AA	GG	GG	CT	GG	TT	CT	GG	TT	AA	CT	GA	CC
52	CONTROL	CONTROL	CONTROL	54									CT	CT	CT	CC	GA	AA	CC	TT	AG	TC	CC	AG	AA	AG	CT	GG	CT
53	CONTROL	CONTROL	CONTROL	60									CC	CC	CC	CC	GA	GA	GC	CT	GG	TT	CC	AG	AT	AA	CT	GA	CT
54	CONTROL	CONTROL	CONTROL	39									CC	TT	CT	CT	GG	GA	GC	CT	GG	TT	CT	AG	AT	AG	CT	GG	CC
55	CONTROL	CONTROL	CONTROL	46									CC	CT	CT	CC	GA	AA	CC	TT	AA	CC	CT	AG	AA	AA	CT	GA	CC
56	CONTROL	CONTROL	CONTROL	69									CT	CT	CT	CC	GA	AA	CC	TT	AA	CC	CC	AA	AA	AA	CC	GG	CT
57	CONTROL	CONTROL	CONTROL	49									CC	TT	CC	CC	GA	AA	CC	TT	AG	TC	CT	AA	AA	AG	CT	GG	CC
58	CONTROL	CONTROL	CONTROL	48									CT	CT	CC	CC	GA	GA	GC	CT	AA	TC	CT	AG	AT	AA	CT	GA	CT
59	CONTROL	CONTROL	CONTROL	72									TT	CC	CT	CC	AA	GA	GC	CT	AA	TC	CT	AG	AT	AG	TT	GA	CT
60	CONTROL	CONTROL	CONTROL	44									CC	CT	CT	CT	GA	AA	CC	TT	AG	TC	CT	AG	AT	AA	CT	GG	CT
61	CONTROL	CONTROL	CONTROL	61									CC	CT	CT	CC	AA	GA	GC	CT	GG	TT	CC	AA	AA	AA	TT	AA	TT
62	CONTROL	CONTROL	CONTROL	34									CC	CC	CC	CT	GA	GG	GC	CT	AA	TC	CC	AG	AT	AA	CT	AA	CC
63	CONTROL	CONTROL	CONTROL	34									CC	CT	CT	CT	GA	GA	GC	CT	GG	TT	CC	AA	AA	AA	CT	GA	CT
64	CONTROL	CONTROL	CONTROL	52									CC	CT	CT	CT	GA	GA	GC	CT	AG	TC	CC	AA	AA	AA	CT	GA	CT
65	CONTROL	CONTROL	CONTROL	51									TT	CC	TT	CT	GA	GG	GG	CT	GG	TT	CT	AA	AA	AA	CT	GG	CT
66	CONTROL	CONTROL	CONTROL	56									TT	CC	CC	CC	AA	GG	GG	CC	GG	TT	CC	AA	AA	AG	CT	GG	CC
67	CONTROL	CONTROL	CONTROL	34									CT	CC	CT	CC	AA	AA	CC	TT	GG	TT	CC	AA	AA	AA	TT	GA	CC
68	CONTROL	CONTROL	CONTROL	44									TT	CC	CT	CC	AA	AA	CC	TT	AA	CC	CC	AA	AA	AA	CT	GG	TT
69	CONTROL	CONTROL	CONTROL	56									CT	CC	CT	CT	GA	AA	CC	TT	AG	TC	CT	AG	AT	AA	CT	GG	CC
70	CONTROL	CONTROL	CONTROL	38									CC	CC	CC	CC	GA	GA	GC	CT	AG	TC	CC	AA	AA	AA	CC	GG	CC
71	CONTROL	CONTROL	CONTROL	45									CT	CT	CT	CC	AA	GA	GC	CT	AA	TC	CC	AG	AA	AA	CC	GG	CC
72	CONTROL	CONTROL	CONTROL	43									CT	CT	CT	CC	AA	GA	GC	CT	AG	TC	CT	AG	AA	AG	CT	GG	CC
73	CONTROL	CONTROL	CONTROL	45									CC	CC	CT	CC	AA	GA	GC	CT	AA	TC	CC	AG	AA	AA	CC	GG	CT
74	CONTROL	CONTROL	CONTROL	46									CC	CC	CC	CC	GA	GA	GC	CT	AA	TC	CC	AG	AT	AA	CC	GG	CC
75	CONTROL	CONTROL	CONTROL	44									CT	CC	CT	CC	AA	GA	GC	CT	AA	TC	CT	AA	AA	GG	TT	GG	CC
76	CONTROL	CONTROL	CONTROL	35									CT	CT	CC	CT	GA	GA	GC	TT	AG	TC	CC	AA	AA	AG	CT	GG	CT
77	CONTROL	CONTROL	CONTROL	49									CC	CT	CT	CT	GA	GA	GC	CT	GG	TT	CT	AA	AA	GG	TT	GG	CT
78	CONTROL	CONTROL	CONTROL	47									CC	CT	CT	CC	AA	AA	CC	TT	AA	CC	CC	AG	AT	AA	CT	GA	CT
79	CONTROL	CONTROL	CONTROL	50									CT	CC	CT	CT	GA	AA	CC	TT	AG	TC	TT	GG	AT	AA	CC	GG	CC
80	CONTROL	CONTROL	CONTROL	58									TT	CC	CT	CC	AA	AA	CC	TT	AA	CC	CT	AA	AA	AG	CT	GG	CC
81	CONTROL	CONTROL	CONTROL	55									CC	CT	TT	CT	GA	GA	GC	TT	AG	TC	TT	AA	AA	AA	CC	GG	CC
82	CONTROL	CONTROL	CONTROL	56									CT	CT	CT	CT	GA	AA	CC	TT	AG	TC	CC	AG	AT	GG	TT	GG	CT
83	CONTROL	CONTROL	CONTROL	44									CT	CT	CT	CT	GG	GA	GC	CT	GG	TT	CC	AA	AA	AG	CT	GG	CC
84	CONTROL	CONTROL	CONTROL	45									CC	CT	CT	CT	GA	GA	GC	CT	GG	TT	CC	AA	AA	AA	CC	GG	CC
85	CONTROL	CONTROL	CONTROL	59									CT	CT	TT	CC	GA	AA	CC	TT	AA	CC	CC	AA	AA	AA	TT	GG	CC
86	CONTROL	CONTROL	CONTROL	55									CT	CC	CT	CT	GG	AA	CC	TT	GG	TT	CC	AG	AA	AA	TT	AA	CT
87	CONTROL	CONTROL	CONTROL	60									CT	CC	CC	CT	GA	GA	GC	CT	AG	TC	CT	AA	AA	AA	CT	GA	TT
88	CONTROL	CONTROL	CONTROL	53									CC	CT	TT	CT	GA	AA	CC	TT	AA	CC	CT	AA	AA	AA	CT	GA	CC
89	CONTROL	CONTROL	CONTROL	51									CC	CT	TT	CC	AA	GA	GC	CT	AG	TC	CT	GG	AT	AA	CC	GG	CC
90	CONTROL	CONTROL	CONTROL	55									CT	CT	CC	CC	AA	GA	GC	TT	AG	TC	CC	AA	AA	AA	CC	GG	CT
91	CONTROL	CONTROL	CONTROL	36									CT	CT	CC	CT	GA	GA	GC	CT	AA	TC	CC	AA	AA	AA	CT	GA	CT
92	CONTROL	CONTROL	CONTROL	44									CT	CT	CC	CC	GA	GG	GG	CC	GG	TT	CC	AG	AT	AG	CT	GG	CT
93	CONTROL	CONTROL	CONTROL	37									CT	CT	CT	CT	GG	GA	GC	CT	AA	TC	CC	AA	AA	AG	CT	GG	CT
94	CONTROL	CONTROL	CONTROL	39									TT	CC	CT	CC	GA	AA	CC	TT	GG	TT	CC	AG	AT	AA	CT	GA	CT
95	CONTROL	CONTROL	CONTROL	46									CC	CC	CT	CT	GG	AA	CC	TT	AA	CC	CC	AA	AA	AA	CT	GA	CT
96	CONTROL	CONTROL	CONTROL	51									TT	CC	CT	CC	GA	AA	CC	TT	AA	CC	CC	AA	AA	AG	TT	GA	TT
97	CONTROL	CONTROL	CONTROL	51									TT	CC	CT	CC	GA	GA	GC	CT	GG	TT	CC	AA	AA	AA	CT	GA	CT
98	CONTROL	CONTROL	CONTROL	48									CT	CC	TT	CC	GG	GG	GG	CC	GG	TT	TT	AA	AA	AA	TT	AA	CC
99	CONTROL	CONTROL	CONTROL	49									CT	CC	TT	CC	GG	GG	GG	CC	GG	TT	CC	AA	AA	AA	CC	GG	CT
100	CONTROL	CONTROL	CONTROL	48									TT	CC	CT	CT	GG	AA	CC	TT	AA	CC	CC	AA	AA	AA	CC	GG	CC
101	CONTROL	CONTROL	CONTROL	49									CT	CC	TT	CC	GA	GA	GC	CT	AA	TC	CC	AA	AA	AG	TT	GG	CT
102	CONTROL	CONTROL	CONTROL	70									CC	CT	CC	CT	GA	GG	GG	CT	GG	TT	CC	AA	AA	AA	CT	GA	TT
103	CONTROL	CONTROL	CONTROL	49									CT	CT	CT	CC	AA	AA	CC	TT	AA	CC	TT	AG	AT	AG	CT	GA	CT
104	CONTROL	CONTROL	CONTROL	66									CT	CT	CT	CT	GG	GA	GC	CT	AG	TC	CC	AA	AA	AG	CT	GG	CC
105	CONTROL	CONTROL	CONTROL	46									CT	CC	CC	CC	AA	GA	GC	CT	GG	TT	CC	AA	AA	AA	CC	GG	CT
106	CONTROL	CONTROL	CONTROL	53									CC	CT	CT	CC	GA	GA	GC	CT	AG	TC	CT	GG	TT	AG	TT	GA	CC
107	CONTROL	CONTROL	CONTROL	68									CT	CC	CT	CT	GG	GA	GC	CT	AG	TC	CC	GG	TT	AA	CC	GG	CT
108	CONTROL	CONTROL	CONTROL	61									CT	CC	CT	TT	GA	GA	GC	CT	AG	TC	CT	AG	AT	AG	TT	GG	CT
109	CONTROL	CONTROL	CONTROL	56									CT	CC	CC	CC	GG	GG	GG	CC	GG	TT	TT	AA	AA	AA	CT	GA	CC
110	CONTROL	CONTROL	CONTROL	52									CT	CT	CT	CT	GA	GA	GC	CT	AA	TC	CC	AG	AT	AA	CC	GA	CC
111	CONTROL	CONTROL	CONTROL	66									CT	CC	TT	CC	AA	GA	GC	CT	AG	TC	CC	AG	AA	AA	CT	GA	CC
112	CONTROL	CONTROL	CONTROL	64									CC	CT	CT	CC	GA	GA	GC	TT	AG	TC	CT	AA	AA	AG	TT	GG	CC
113	CONTROL	CONTROL	CONTROL	69									CC	CC	TT	CT	GA	GA	GC	CT	AA	TC	CC	AG	AA	AA	CT	GG	CC
